# Supplementary material for: Adducts of aqua complexes of Ln3+with hexahydroxyhexamethylcucurbit[6]uril: potential application in the isolation of heavy lanthanides
Source: Royal Society of Chemistry journal article supplement (doi:10.1039/c5nj00964b), 2016-01-01
Supplement: c5nj00964b1.pdf [file c5nj00964b1.pdf]

## Supplementary Information

# Adducts of Aqua Complexes of Ln<sup>3+</sup> with hexanohydroxyhexanomethylcucurbit[6]uril: Potential Application in the Isolation of Heavy Lanthanides

Wen-Xuan Zhao,<sup>a</sup> Chuan-Zeng Wang,<sup>a</sup> Ying Zhang,<sup>b</sup> Yun-Qian Zhang,<sup>a</sup> Sai-Feng Xue,<sup>a</sup> Zhu Tao,<sup>a</sup> Jack K. Clegg,<sup>c</sup> Qian-Jiang Zhu,<sup>\*a</sup> Leonard F. Lindoy,<sup>\*d</sup> and Gang Wei<sup>\*e</sup>

## EXPERIMENTAL SECTION

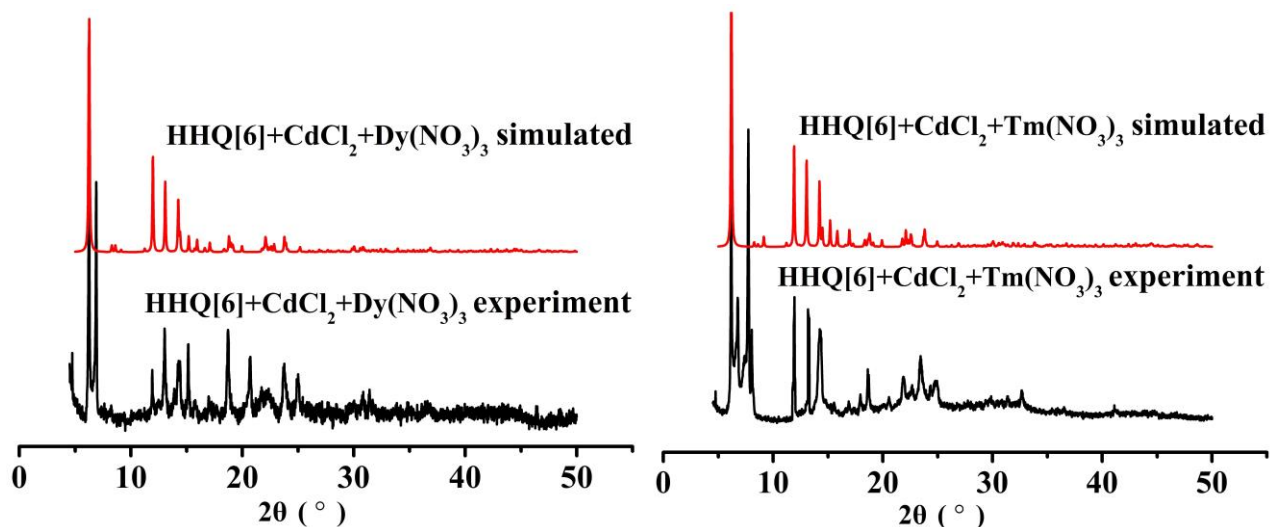

**Figure S1** Powder X-ray diffraction (PXRD) of the four coordination complexes from the isomorphous group, respectively

**Isothermal titration calorimetry:** Microcalorimetric experiments were performed using an isothermal titration calorimeter Nano ITC 2G (TA, USA) at 293.15 K. Each experiment consisted of 25 consecutive injections (10  $\mu$ L) of a solution of (Ln(NO<sub>3</sub>)<sub>3</sub>·5 or 6H<sub>2</sub>O respectively:  $5 \times 10^{-3}$  M) into the microcalorimetric reaction cell (1 mL) charged with a solution of HHQ[6] ( $5 \times 10^{-4}$  M). The heat of reaction was corrected for the heat of dilution of the guest solution, determined in the separate experiments. All solutions were degassed prior to titration experiment by sonication. Computer simulations (curve fitting) were performed using the Nano ITC analyze software.

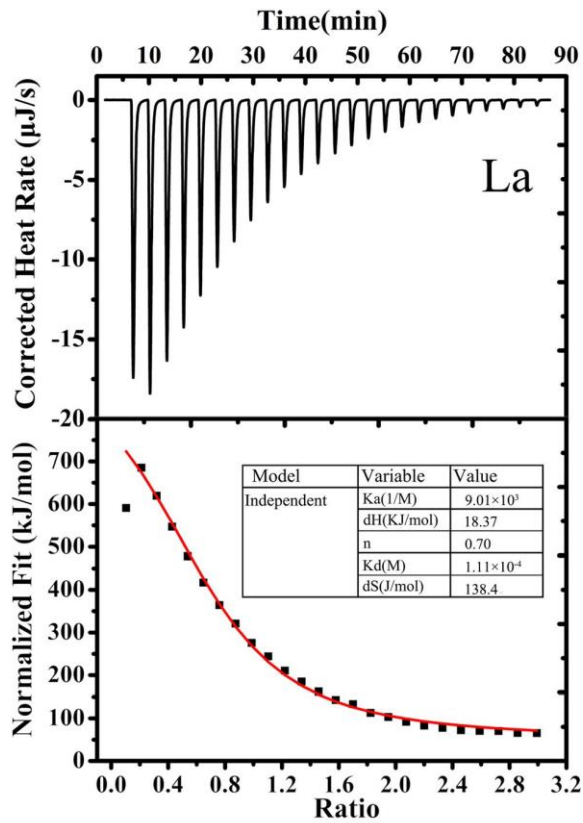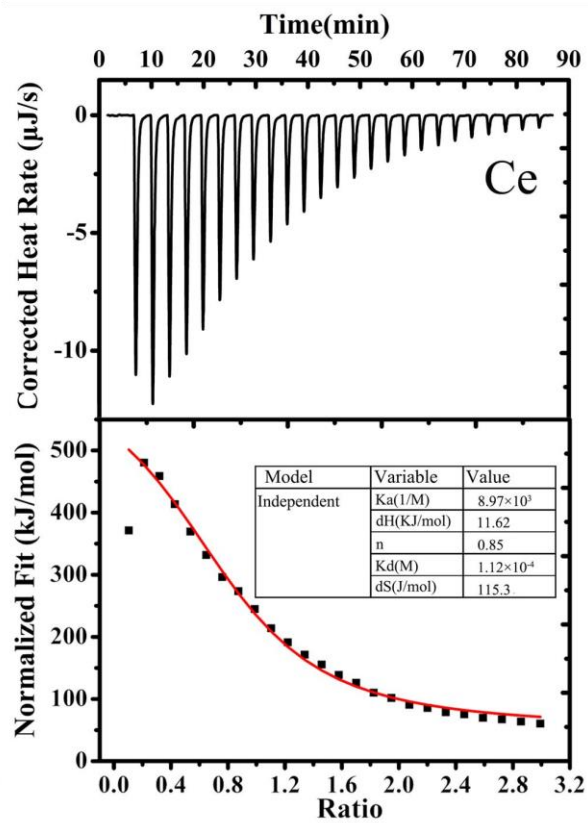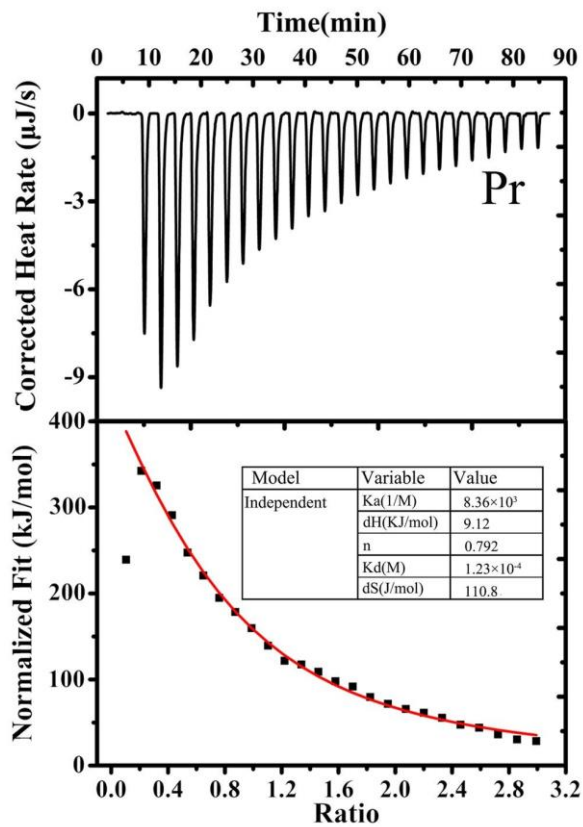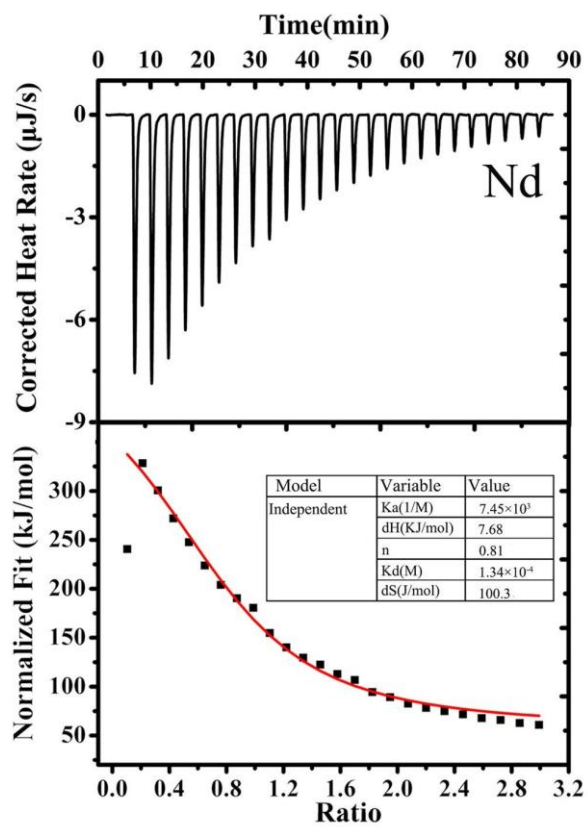

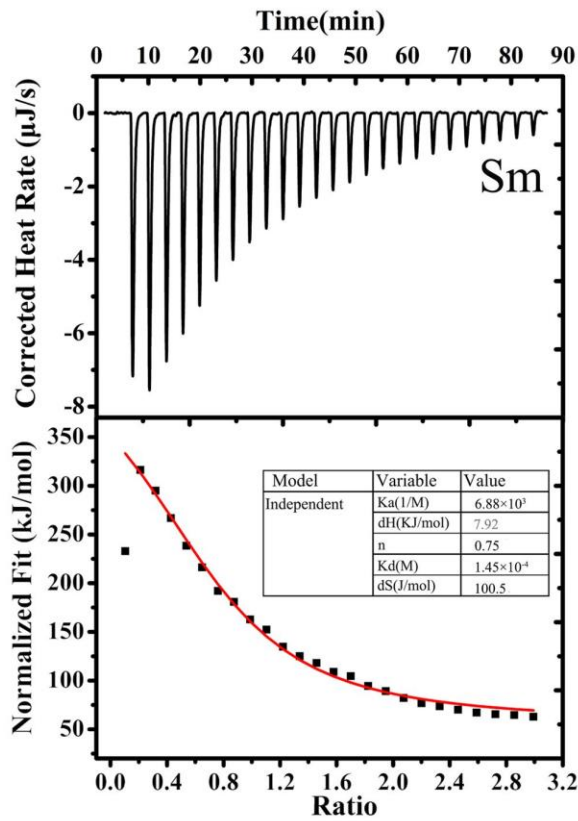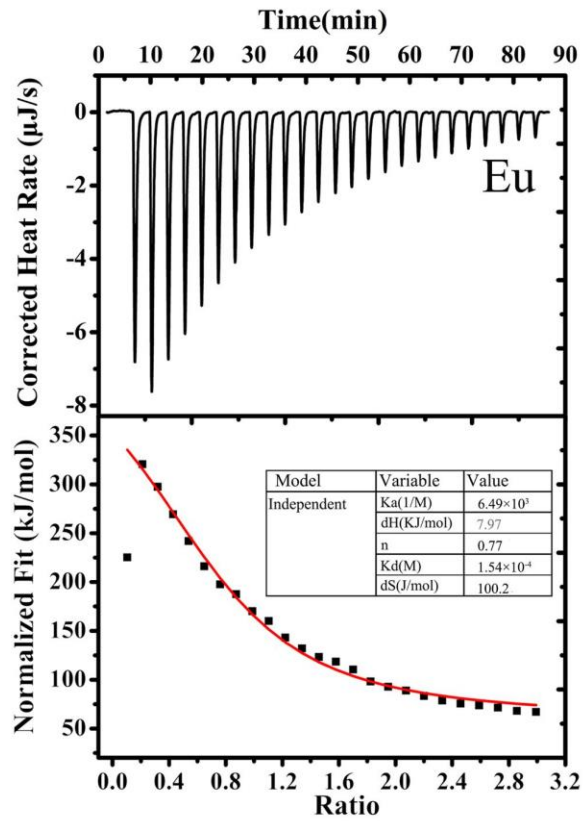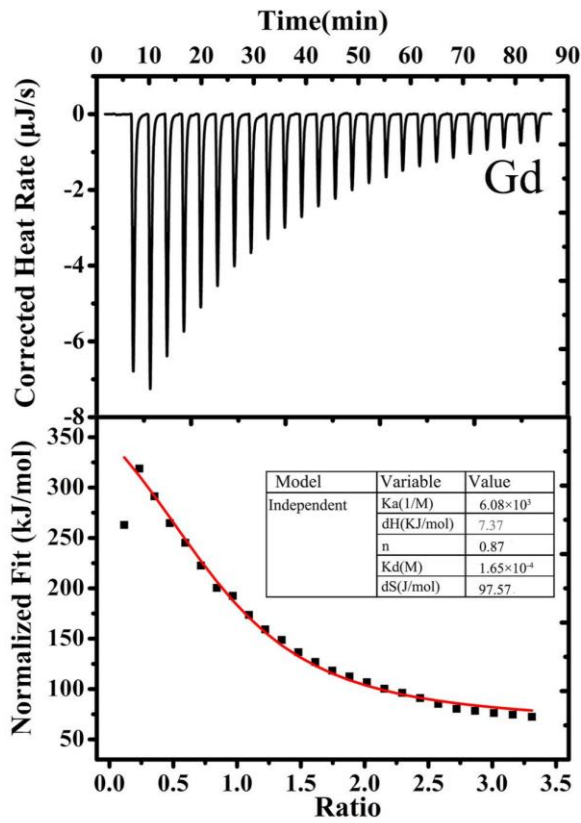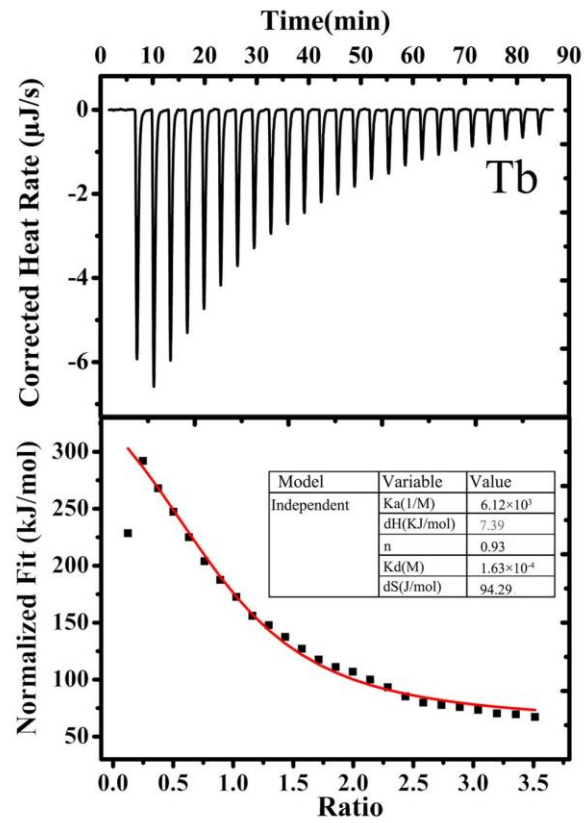

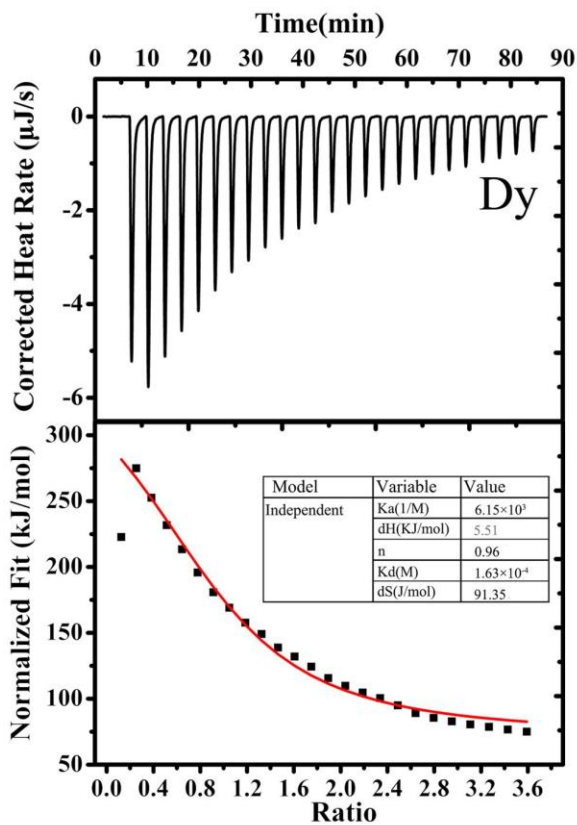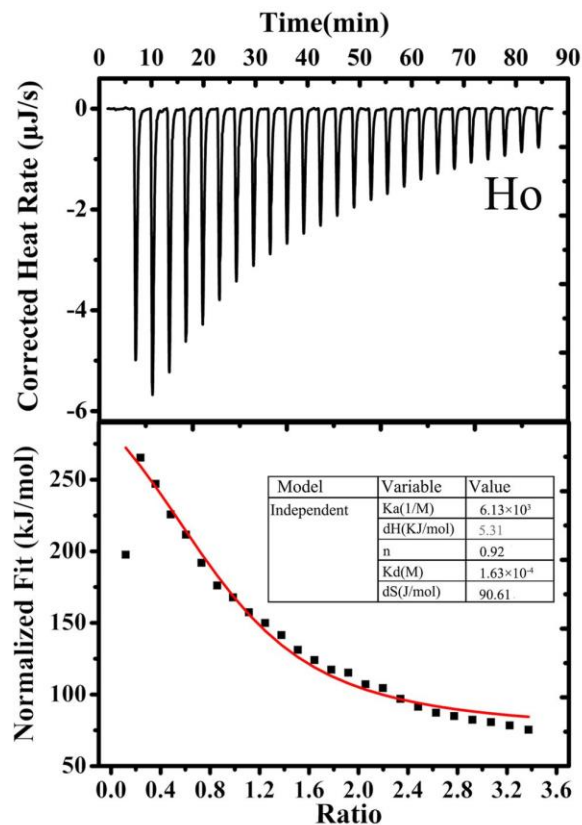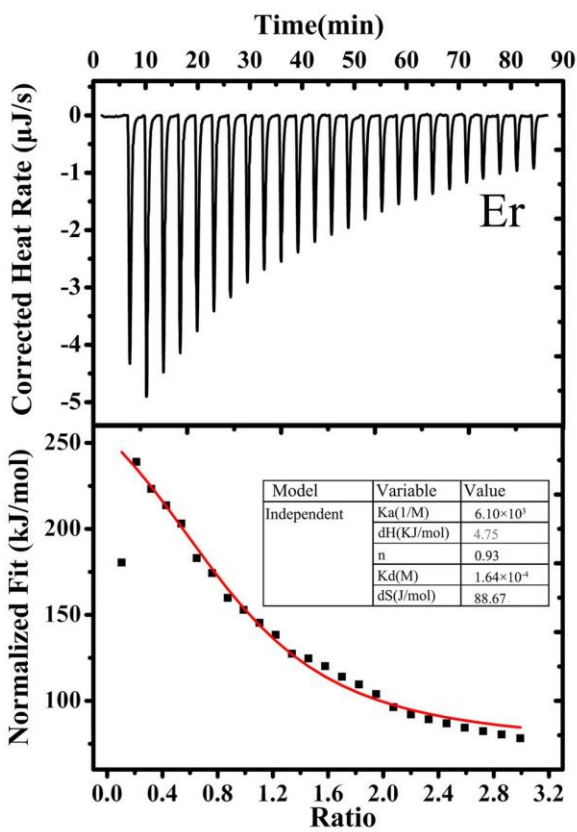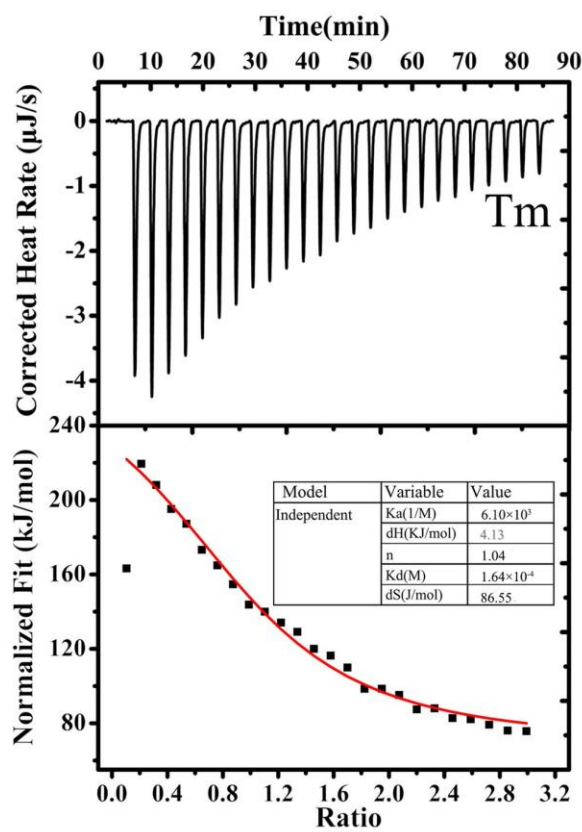

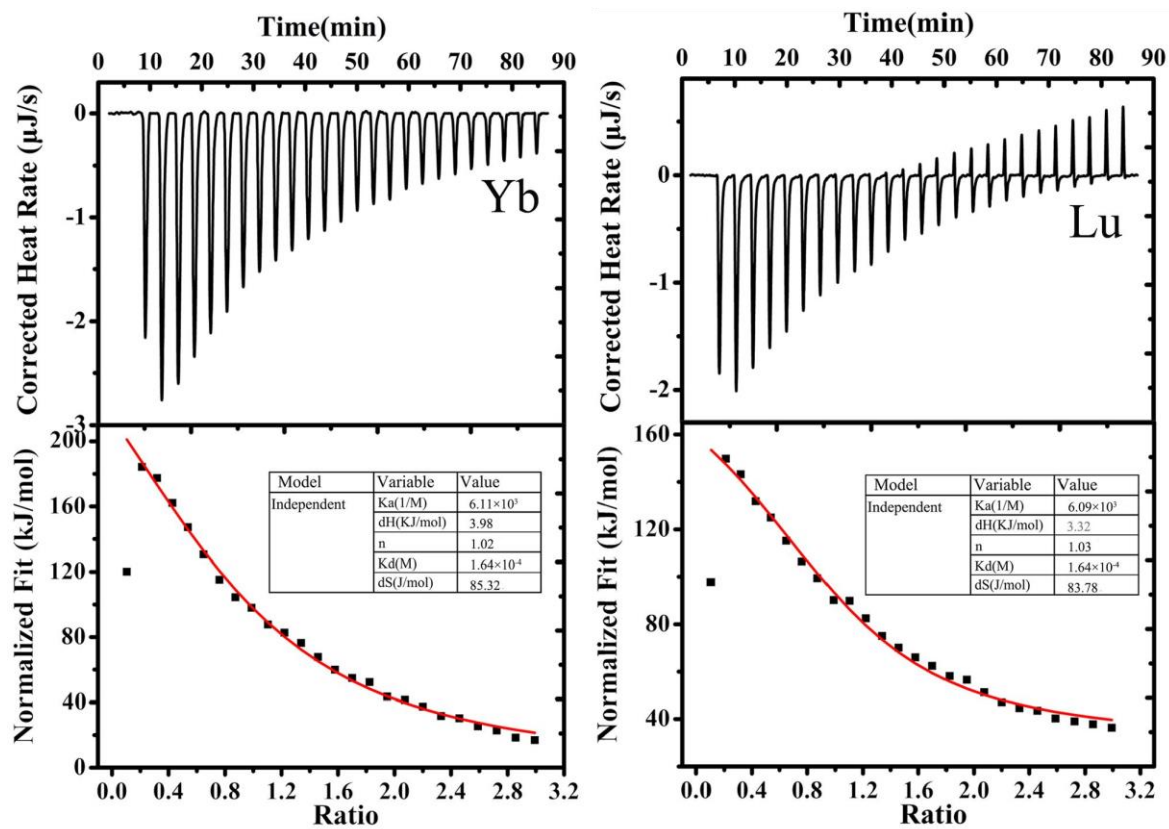

**Figure S2** Isothermal titration calorimetry profiles of HHQ[6] with  $\text{Ln}(\text{NO}_3)_3$  at 293.15 K: Ln = (a) La; (b) Ce; (c) Pr; (d) Nd; (e) Sm; (f) Eu; (g) Gd; (h) Tb; (i) Dy; (j) Ho; (k) Er; (l) Tm; (m) Yb; (n) Lu.

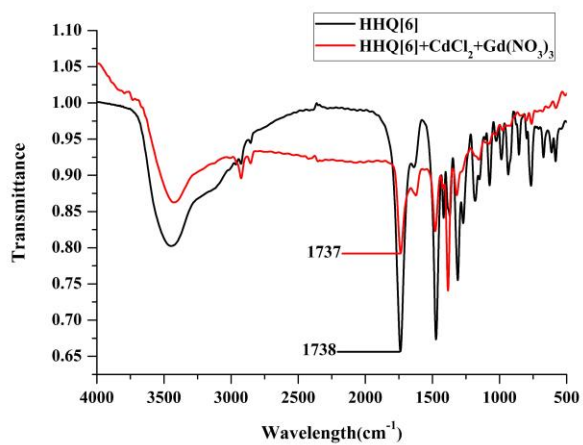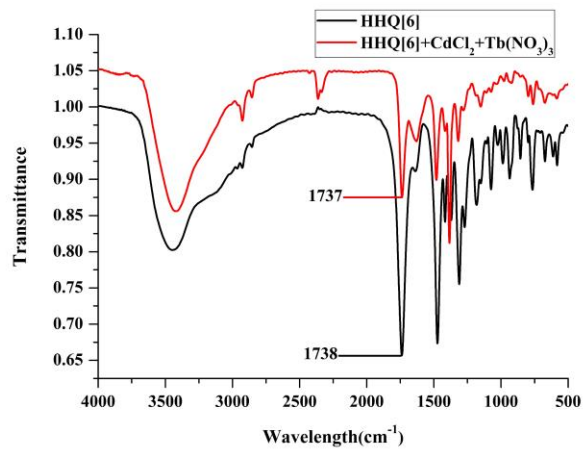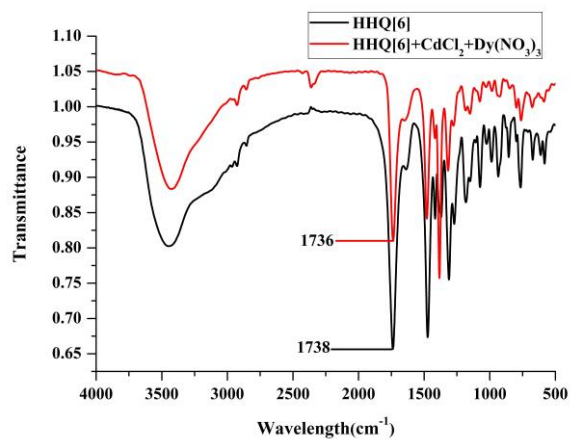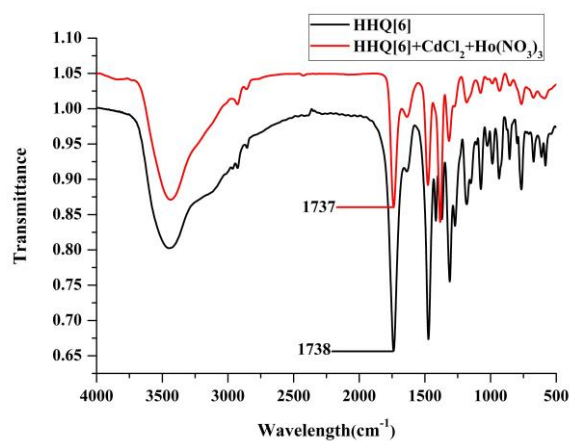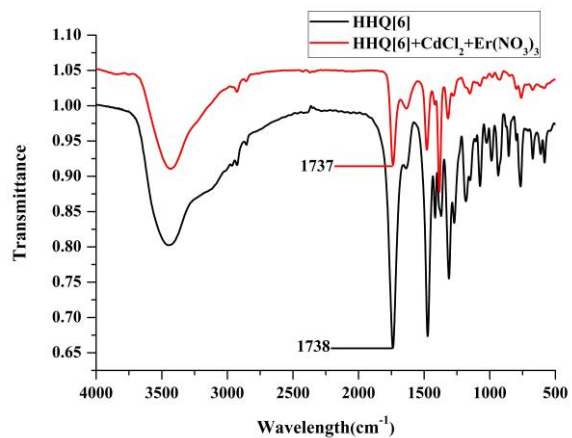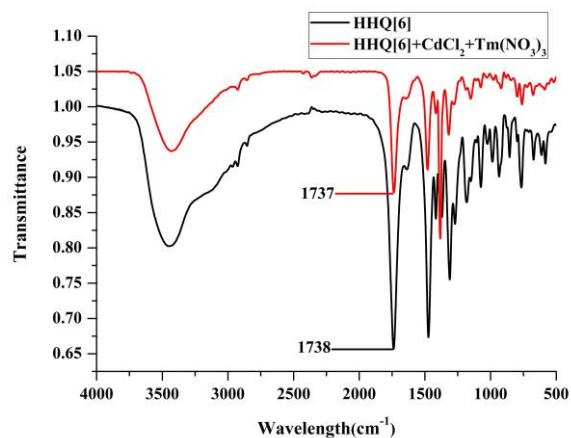

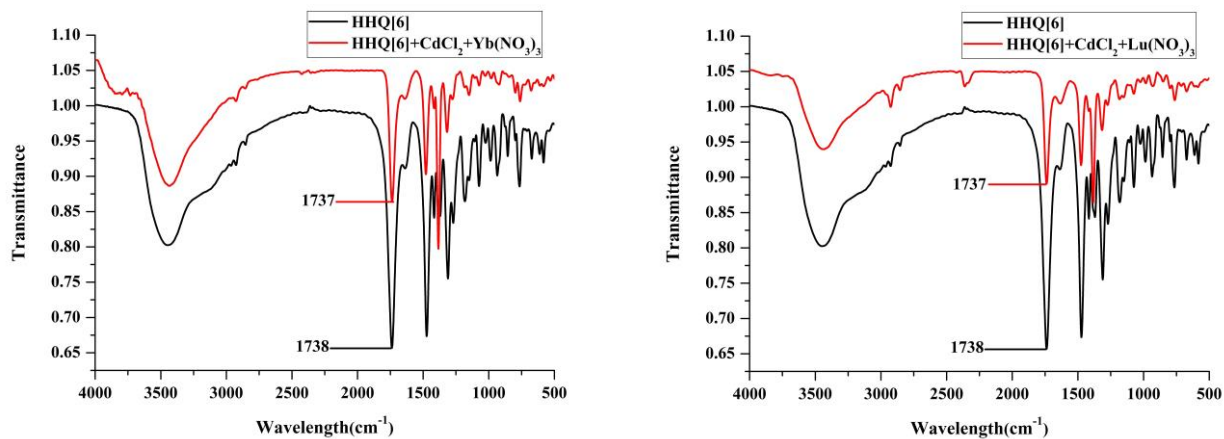

Figure S3 FT-IR spectra of compounds 1~8 with a comparison of HHQ[6] powders respectively.

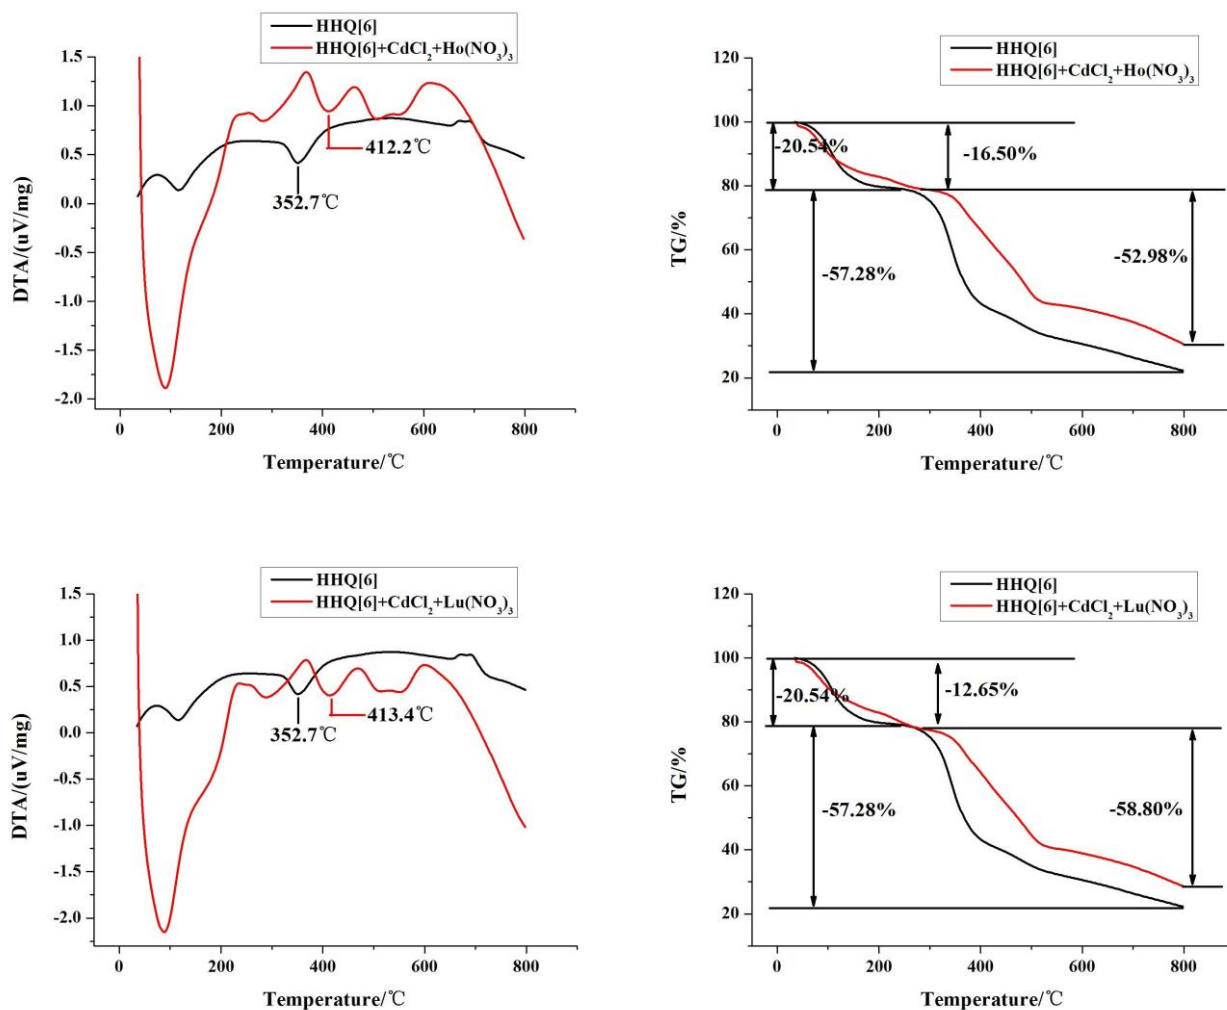

Figure S4 DTA (left) and TG (right) curves of compounds 4 , 8 with a comparison HHQ[6] in N<sub>2</sub> respectively



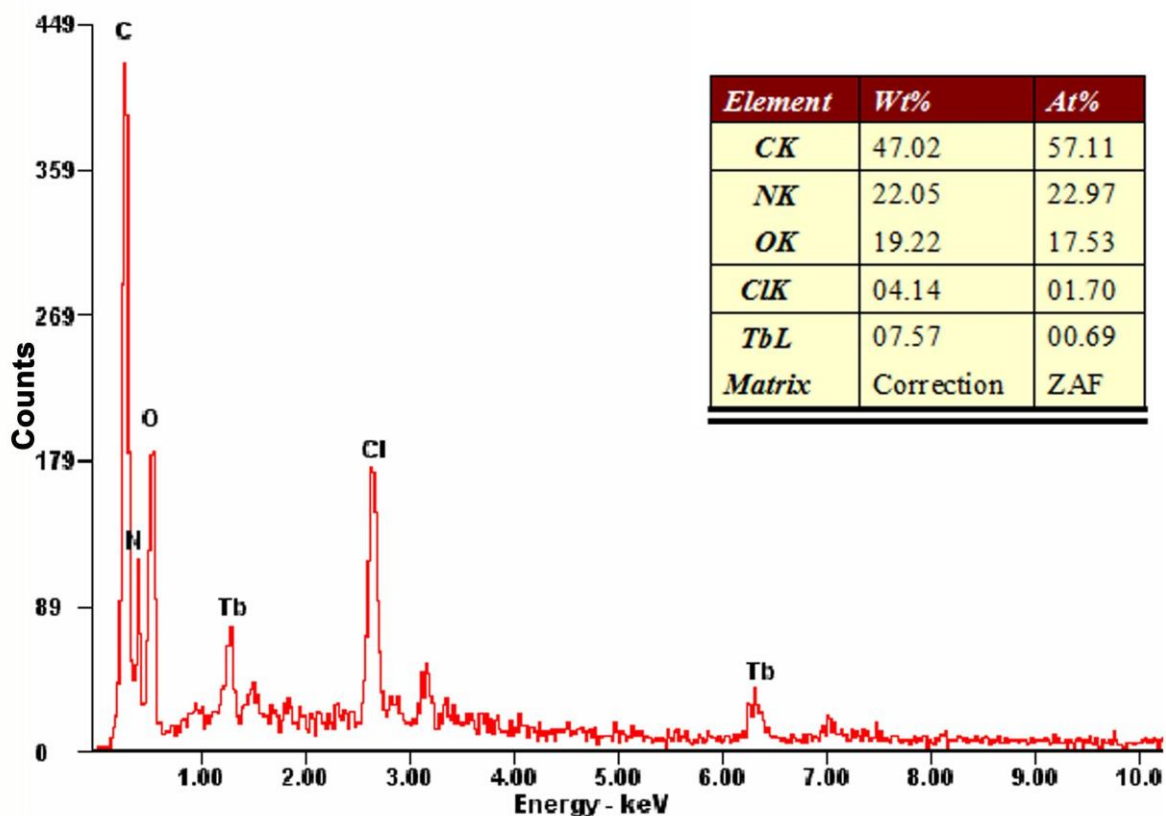

| <i>Element</i> | <i>Wt%</i> | <i>At%</i> |
|----------------|------------|------------|
| <i>CK</i>      | 47.02      | 57.11      |
| <i>NK</i>      | 22.05      | 22.97      |
| <i>OK</i>      | 19.22      | 17.53      |
| <i>ClK</i>     | 04.14      | 01.70      |
| <i>TbL</i>     | 07.57      | 00.69      |
| <i>Matrix</i>  | Correction | ZAF        |

HHQ[6]+CdCl<sub>2</sub>+La(NO<sub>3</sub>)<sub>3</sub>,Tb(NO<sub>3</sub>)<sub>3</sub>(1:1)

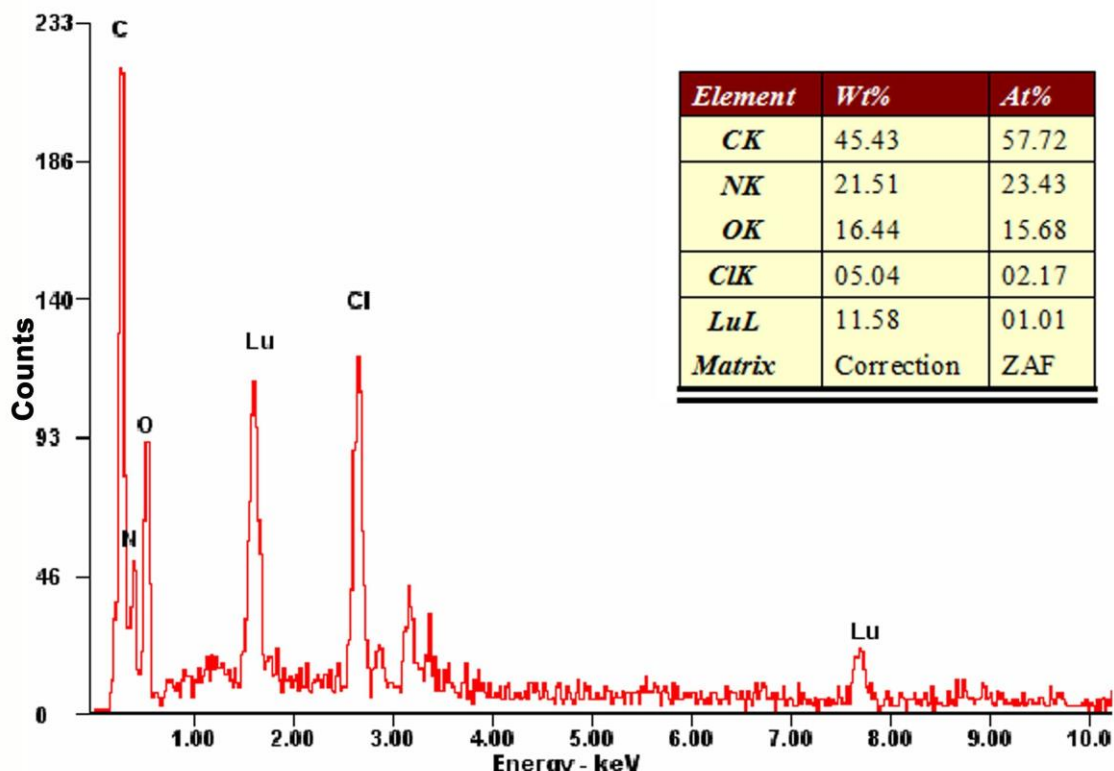

| <i>Element</i> | <i>Wt%</i> | <i>At%</i> |
|----------------|------------|------------|
| <i>CK</i>      | 45.43      | 57.72      |
| <i>NK</i>      | 21.51      | 23.43      |
| <i>OK</i>      | 16.44      | 15.68      |
| <i>ClK</i>     | 05.04      | 02.17      |
| <i>LuL</i>     | 11.58      | 01.01      |
| <i>Matrix</i>  | Correction | ZAF        |

HHQ[6]+CdCl<sub>2</sub>+La(NO<sub>3</sub>)<sub>3</sub>,Lu(NO<sub>3</sub>)<sub>3</sub>(1:1)

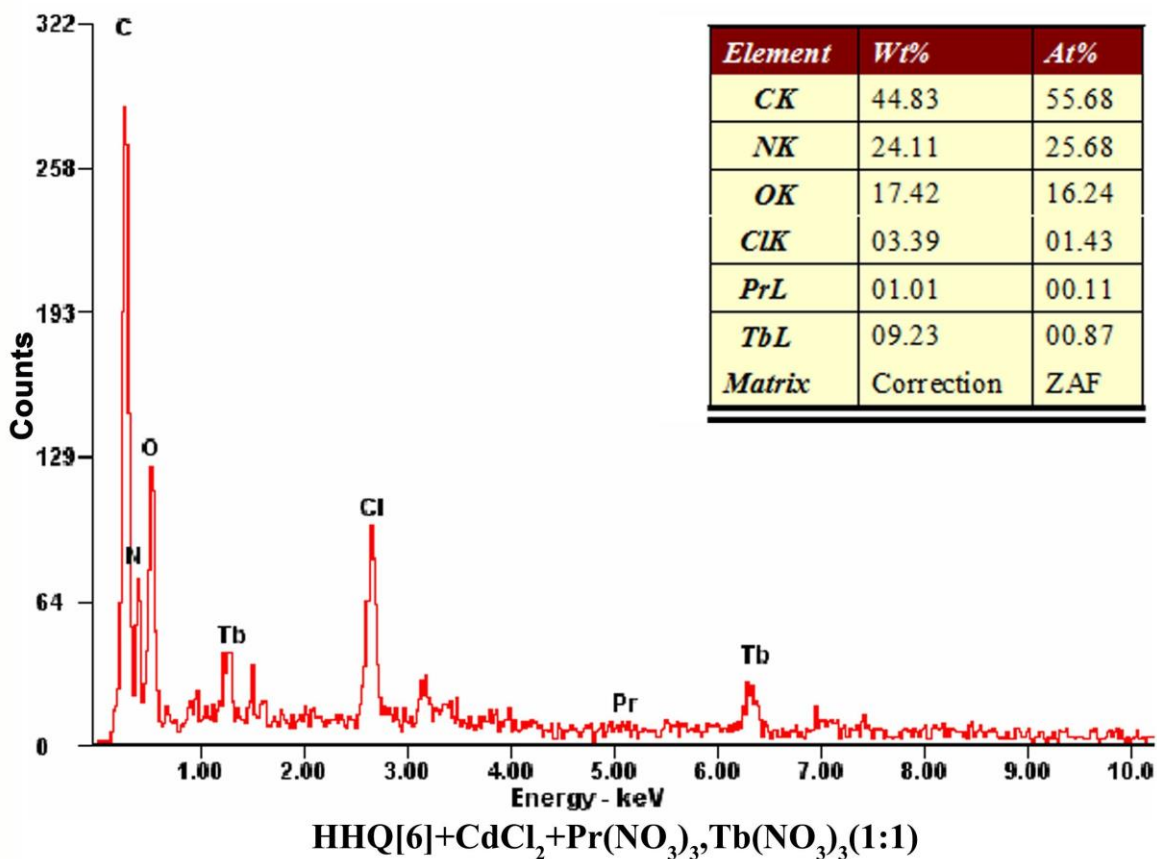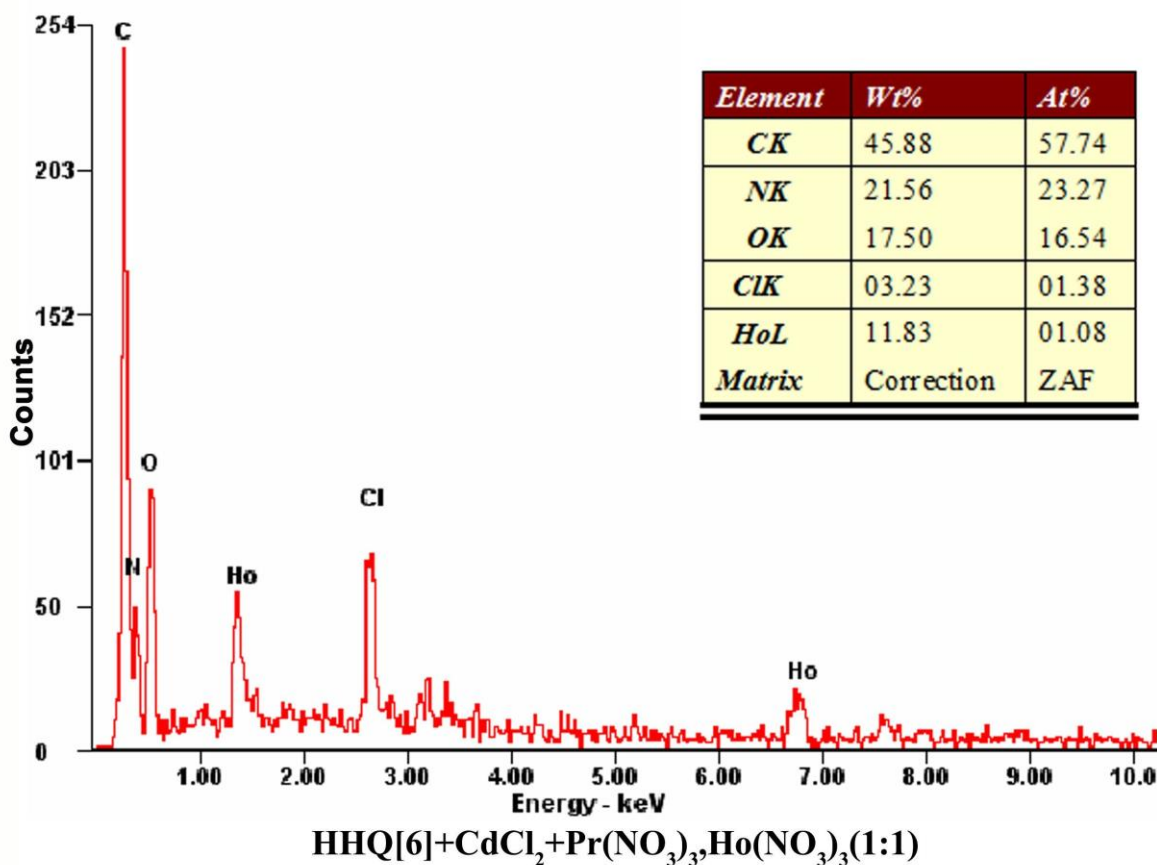

**Figure S5** Electron spectroscopies of the representative products isolated from  $\text{Ln}^{3+}_{\text{light}}-\text{Ln}^{3+}_{\text{heavy}}-\text{CdCl}_2$  systems mixtures with 1:1  $\text{Ln}^{3+}_{\text{light}}:\text{Ln}^{3+}_{\text{heavy}}$  ratios

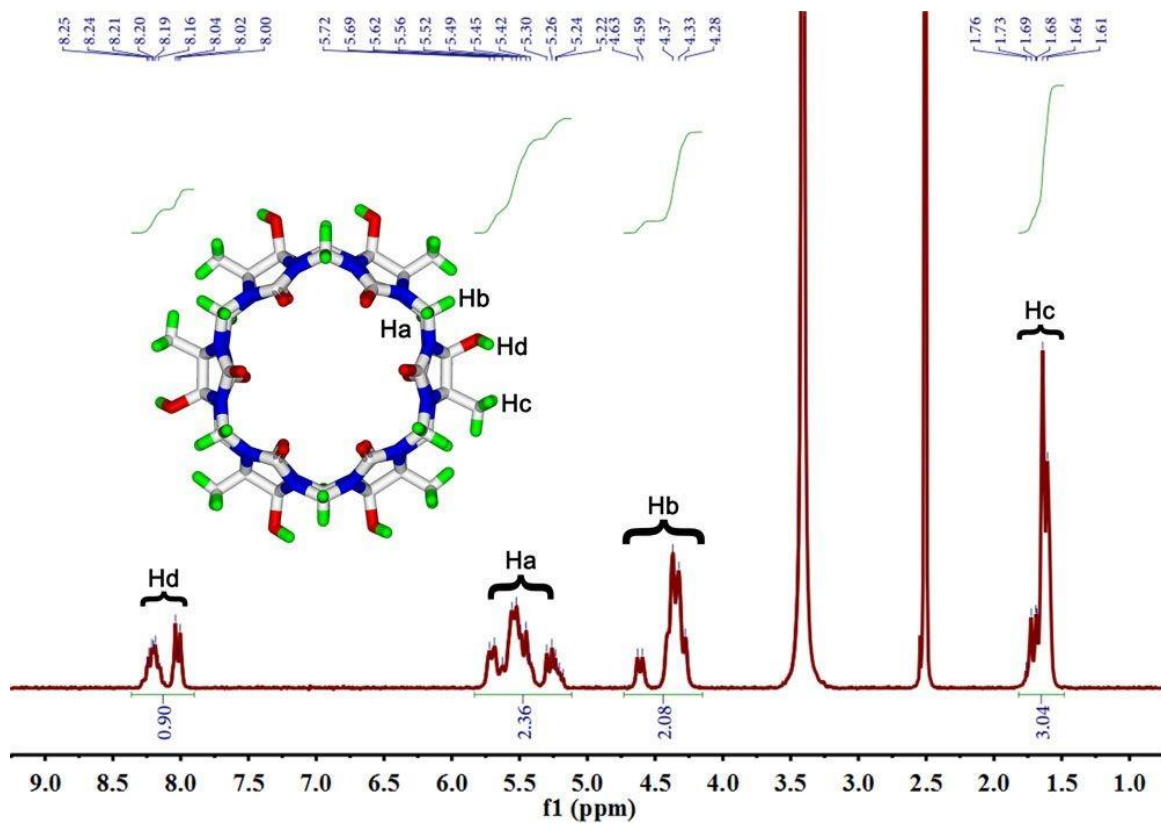

**Figure S6**  $^1\text{H}$  NMR spectra of HHQ[6] in DMSO- $d_6$
